# Supplementary material
Source: PubMed Central journal article supplement (PMC3346078)
Supplement: supp_M112.346361_jbc.M112.346361-1.pdf [file supp_M112.346361_jbc.M112.346361-1.pdf]

## Supplementary Data

**Table S1:** Oligonucleotides used.

|                                     |                                                                                                                                                                                                |
|-------------------------------------|------------------------------------------------------------------------------------------------------------------------------------------------------------------------------------------------|
| <b><i>SASX analysis</i></b>         |                                                                                                                                                                                                |
| ssDNA                               | 5'-TAC-GAA-TTG-CTT-GGA-ATC-CTG-ACG-AAC-3'                                                                                                                                                      |
| <b><i>Binding</i></b>               |                                                                                                                                                                                                |
| ssDNA                               | TAMRA-5'-ATG-CCT-GCA-CGA-ATA-GCA-ATT-CGT-AAT-CAT-G-3'                                                                                                                                          |
| dsDNA with 5' Flap                  | TAMRA-5'-ATG-CCT-GCA-CGA-ATA-GCA-ATT-CGT-AAT-CAT-G-3'<br>5' -GAT-GTC-AAG-CAG-TCC-TAA-GGA-TTC-GTG-CAG-GCA-T- 3'<br>5' -CAT-GAT-TAC-GAA-TTG-CT-3'                                                |
| dsDNA with 3' Flap                  | TAMRA-5' - ATG-CCT-GCA-CGA-ATA-GCA-ATT-CGT-AAT-CAT-G-3'<br>5' - CAT-GAT-TAC-GAA-TTG-CTG-GAA-TCC-TGA-CGA-ACT-GTA-G-3'<br>5' ATT-CGT-GCA-GGC-AT-3'                                               |
| <b><i>FRET DNA Bending</i></b>      |                                                                                                                                                                                                |
| dsDNA with 5' Flap                  | TAMRA-5'-ATG-CCT-GCA-CGA-ATA-GCA-ATT-CGT-AAT-CAT-G-3'<br>5' -GAT-GTC-AAG-CAG-TCC-TAA-GGA-TTC-GTG-CAG-GCA-T- 3'<br>5' -CAT-GAT-TAC-GAA-TTG-CT-3'-FAM                                            |
| dsDNA with 3' Flap                  | TAMRA-5' - ATG-CCT-GCA-CGA-ATA-GCA-ATT-CGT-AAT-CAT-G-3'<br>5' - CAT-GAT-TAC-GAA-TTG-CTG-GAA-TCC-TGA-CGA-ACT-GTA-G-3'<br>5' ATT-CGT-GCA-GGC-AT-3'-FAM                                           |
| <b><i>FRET NucS Position</i></b>    |                                                                                                                                                                                                |
| dsDNA with 5' Flap<br>labeled in 5' | TAMRA-5'-ATG-CCT-GCA-CGA-ATA-GCA-ATT-CGT-AAT-CAT-G-3'<br>5' -GAT-GTC-AAG-CAG-TCC-TAA-GGA-TTC-GTG-CAG-GCA-T- 3'<br>5' -CAT-GAT-TAC-GAA-TTG-CT-3'                                                |
| dsDNA with 5' Flap<br>labeled in 3' | 5'-ATG-CCT-GCA-CGA-ATA-GCA-ATT-CGT-AAT-CAT-G-3'- TAMRA<br>5' -GAT-GTC-AAG-CAG-TCC-TAA-GGA-TTC-GTG-CAG-GCA-T- 3'<br>5' -CAT-GAT-TAC-GAA-TTG-CT-3'                                               |
| dsDNA with 3' Flap<br>labeled in 5' | TAMRA-5' - ATG-CCT-GCA-CGA-ATA-GCA-ATT-CGT-AAT-CAT-G-3'<br>5' - CAT-GAT-TAC-GAA-TTG-CTG-GAA-TCC-TGA-CGA-ACT-GTA-G-3'<br>5' ATT-CGT-GCA-GGC-AT-3'                                               |
| dsDNA with 3' Flap<br>labeled in 3' | 5' - ATG-CCT-GCA-CGA-ATA-GCA-ATT-CGT-AAT-CAT-G-3'- TAMRA<br>5' - CAT-GAT-TAC-GAA-TTG-CTG-GAA-TCC-TGA-CGA-ACT-GTA-G-3'<br>5' ATT-CGT-GCA-GGC-AT-3'                                              |
| <b><i>Activity</i></b>              |                                                                                                                                                                                                |
| dsDNA with 5' Flap                  | FAM-5'-AGC-TAT-GAC-CAT-GAT-TAC-GAA-TTG-CTT-GGA-ATC-CTG-<br>ACG-AAC-TGT-AG-3'<br>5' CTA-CAG-TTC-GTC-AGG-ATT-CCA-AGC-AAG-CTA-CCA-TGC-CTG-<br>CAC-GAA-TT-3'<br>5'-AAT-TCG-TGC-AGG-CAT-GGT-AGCT-3' |

|                           |                                                                                                                                                                                         |
|---------------------------|-----------------------------------------------------------------------------------------------------------------------------------------------------------------------------------------|
| <i>dsDNA with 3' Flap</i> | 5'-GAT-GTC-AAG-CAG-TCC-TAA-GGA-ATT-CGT-GCA-GGC-ATG-GTA-GCT-3'-FAM<br>5' AAG-CAA-TTC-GTA-ATC-ATG-GTC-ATA-GCT-CCT-TAG-GAC-TGC-TTG-ACA-TC -3'<br>5'-AGC-TAT-GAC-CAT-GAT-TAC-GAA-TTG-CTT-3' |
|---------------------------|-----------------------------------------------------------------------------------------------------------------------------------------------------------------------------------------|

**Table S2:** Kinetic parameters of the interactions *PabPCNA*-PIP peptide and *PabPCNA*-*PabNucS*.

|                 | $k_{ON1}$<br>( $\times 10^{-3} M^{-1} \cdot s^{-1}$ ) | $k_{OFF1}$<br>( $\times 10^3 s^{-1}$ ) | $K_{D1}$<br>( $\times 10^{-6} M$ ) | $k_{ON2}$<br>( $\times 10^3 s^{-1}$ ) | $k_{OFF2}$<br>( $\times 10^3 s^{-1}$ ) | $K_{D2}$<br>( $\times 10^{-3}$ ) | $R_{MAX}$<br>( $\mu RIU$ ) | $K_{DApp}$<br>( $\times 10^{-6} M$ )* |
|-----------------|-------------------------------------------------------|----------------------------------------|------------------------------------|---------------------------------------|----------------------------------------|----------------------------------|----------------------------|---------------------------------------|
| <b>PIP NucS</b> | $5.1 \pm 0.1$                                         | $47 \pm 1$                             | $9.2 \pm 0.3$                      |                                       |                                        |                                  | $20.68 \pm 0.06$           | $9.2 \pm 0.3$                         |
| <b>NucS</b>     | $3.48 \pm 0.07$                                       | $22.0 \pm 0.5$                         | $6.3 \pm 0.2$                      | $4.10 \pm 0.05$                       | $0.86 \pm 0.01$                        | $210 \pm 4$                      | $257 \pm 53$               | $1.33 \pm 0.05$                       |

\* For systems with linked equilibria,  $K_{DApp}$  was obtained from the equation:  $K_{Dapp} = K_{D1} \times K_{D2}$ . Propagated

errors were calculated from the equation:  $\Delta K_{DApp} = K_{DApp} \sqrt{\left(\frac{\Delta K_{D1}}{K_{D1}}\right)^2 + \left(\frac{\Delta K_{D2}}{K_{D2}}\right)^2}$
